# Supplementary material
Source: PubMed Central journal article supplement (PMC6512260)
Supplement: jamaophthalmol-137-543-s001.pdf [file jamaophthalmol-137-543-s001.pdf]

## Supplementary Online Content

Tisdale AK, Agrón E, Sunshine SB, Clemons TE, Ferris FL III, Chew EY; Age-Related Eye Disease Study Research Group. Association of dietary and supplementary calcium intake with age-related macular degeneration: Age-Related Eye Disease Study report 39. *JAMA Ophthalmol*. Published March 21, 2019. doi:10.1001/jamaophthalmol.2019.0292

**eTable 1.** Calorie-adjusted Dietary Calcium Intake for Female AREDS Participants

**eTable 2.** Calorie-adjusted Dietary Calcium Intake for Male AREDS Participants

This supplementary material has been provided by the authors to give readers additional information about their work.

eTable 1. Calorie-adjusted Dietary Calcium Intake for Female AREDS Participants

| Calcium Intake (mg per kilocalorie) for Women |     |         |         |        |        |                    |
|-----------------------------------------------|-----|---------|---------|--------|--------|--------------------|
| Quintiles                                     | N   | Minimum | Maximum | Median | Mean   | Standard Deviation |
| 1                                             | 530 | 0.1469  | 0.3624  | 0.3081 | 0.2979 | 0.0481             |
| 2                                             | 531 | 0.3627  | 0.4536  | 0.4080 | 0.4086 | 0.0257             |
| 3                                             | 531 | 0.4542  | 0.5591  | 0.5022 | 0.5040 | 0.0301             |
| 4                                             | 531 | 0.5592  | 0.7046  | 0.6271 | 0.6278 | 0.0417             |
| 5                                             | 531 | 0.7054  | 2.0440  | 0.8287 | 0.8975 | 0.1905             |

eTable 2. Calorie-adjusted Dietary Calcium Intake for Male AREDS Participants

| Calcium Intake (mg per kilocalorie) for Men |     |         |         |        |        |                    |
|---------------------------------------------|-----|---------|---------|--------|--------|--------------------|
| Quintiles                                   | N   | Minimum | Maximum | Median | Mean   | Standard Deviation |
| 1                                           | 419 | 0.1161  | 0.3315  | 0.2873 | 0.2806 | 0.0378             |
| 2                                           | 420 | 0.3318  | 0.4051  | 0.3689 | 0.3677 | 0.0217             |
| 3                                           | 419 | 0.4055  | 0.4843  | 0.4440 | 0.4445 | 0.0226             |
| 4                                           | 420 | 0.4845  | 0.5951  | 0.5338 | 0.5361 | 0.0305             |
| 5                                           | 419 | 0.5961  | 1.5829  | 0.6966 | 0.7590 | 0.1789             |
